# Supplementary material
Source: PubMed Central journal article supplement (PMC3778145)
Supplement: NIHMS492313-supplement-1.pdf [file NIHMS492313-supplement-1.pdf]

|                 | MC2                                                                                               |
|-----------------|---------------------------------------------------------------------------------------------------|
| Latin 1st       | 0 1 2 3 4 5 6 7 8 9 A B C D E F G H I J K L M N O P Q R S T U V W X Y Z                           |
| Latin Last      | 0 1 2 3 4 5 6 7 8 9 A B C D E F G H I J K L M N O P Q R S T U V W X Y Z                           |
| Devanagari 1st  | ० १ २ ३ ४ ५ ६ ७ ८ ९ अ आ ऐ औ ब भ च छ द ध ए ग घ ङ इ ई ज झ क ख ल म न ङ ण ओ औ ष फ र ऋ स श ष त थ ऊ व य |
| Devanagari Last | ० १ २ ३ ४ ५ ६ ७ ८ ९ अ आ ऐ औ ब भ च छ द ध ए ग घ ङ इ ई ज झ क ख ल म न ङ ण ओ औ ष फ र ऋ स श ष त थ ऊ व य |
| Hebrew 1st      | ב ד ג ה ל מ ק ר ש ת                                                                               |
| Hebrew Last     | ב ד ג ה ל מ ק ר ש ת                                                                               |
| Cyrillic 1st    | А Б В Г Д Е Ё Ж З И Й К Л М Н О П Р С Т У Ф Х Ц Ч Ш Щ Ъ Ы Ь Э Ю Я                                 |
| Cyrillic Last   | А Б В Г Д Е Ё Ж З И Й К Л М Н О П Р С Т У Ф Х Ц Ч Ш Щ Ъ Ы Ь Э Ю Я                                 |
| Armenian 1st    | Ա Բ Գ Դ Ե Զ Է Ը Թ Ժ Ի Լ Խ Ծ Կ Զ Դ Ե Մ Յ Ն Շ Ո Գ Պ Ջ Ռ Ս Վ Տ Ր Ց Ի Փ Թ Օ Ֆ                         |
| Armenian Last   | Ա Բ Գ Դ Ե Զ Է Ը Թ Ժ Ի Լ Խ Ծ Կ Զ Դ Ե Մ Յ Ն Շ Ո Գ Պ Ջ Ռ Ս Վ Տ Ր Ց Ի Փ Թ Օ Ֆ                         |
|                 | DN                                                                                                |
| Latin           | 0 1 2 3 4 5 6 7 8 9 A B C D E F G H I J K L M N O P Q R S T U V W X Y Z                           |
| Cyrillic 1st    | А Б В Г Д Е Ё Ж З И Й К Л М Н О П Р С Т У Ф Х Ц Ч Ш Щ Ъ Ы Ь Э Ю Я                                 |
| Cyrillic Last   | А Б В Г Д Е Ё Ж З И Й К Л М Н О П Р С Т У Ф Х Ц Ч Ш Щ Ъ Ы Ь Э Ю Я                                 |
| Armenian 1st    | Ա Բ Գ Դ Ե Զ Է Ը Թ Ժ Ի Լ Խ Ծ Կ Զ Դ Ե Մ Յ Ն Շ Ո Գ Պ Ջ Ռ Ս Վ Տ Ր Ց Ի Փ Թ Օ Ֆ                         |
| Armenian Last   | Ա Բ Գ Դ Ե Զ Է Ը Թ Ժ Ի Լ Խ Ծ Կ Զ Դ Ե Մ Յ Ն Շ Ո Գ Պ Ջ Ռ Ս Վ Տ Ր Ց Ի Փ Թ Օ Ֆ                         |
